# Supplementary material
Source: PubMed Central journal article supplement (PMC5640816)
Supplement: MCB.00214-17_zmb999101633s1.pdf [file MCB.00214-17_zmb999101633s1.pdf]

**Supplemental Figure. 1.** Human TRMT1 and TRMT1L contain subcellular localization signals. (A) Prediction of bipartite nuclear localization signals in TRMT1 and TRMT1L using cNLS Mapper ([http://nls-mapper.iab.keio.ac.jp/cgi-bin/NLS\\_Mapper\\_form.cgi](http://nls-mapper.iab.keio.ac.jp/cgi-bin/NLS_Mapper_form.cgi)). (B) Prediction of a mitochondrial targeting signal and cleavage sites in TRMT1 using (B) MitoFates (<http://mitf.cbrc.jp/MitoFates/cgi-bin/top.cgi>) or (C) TPpred2 (<http://tppred2.biocomp.unibo.it/tppred2>). Proteolytic cleavage sites in TRMT1 for mitochondria processing peptidase (MPP) and intermediate cleavage peptidase 55 (Icp55) were predicted using MitoFates. For TPpred2, two mitochondrial cleavage sites are predicted as defined: R3a = RX [FLY]j[SA] and R3b = RX[FLY]jX. (D) TRMT1 tagged with GFP was transiently expressed in HeLa cells with mitochondrial staining using Chromeo live cell stain and nuclear staining with DAPI.

**A TRMT1**

MQGSSLWLSLTFRSARVLSRARFFFEWQSPGLPNTAAMENGTGPYGEERPVEVQETTVEGAAKIAFPSAN  
 EVFYNPVQEFNRDLTCAVITEFARIQLGAKGIQIKVPGEKDTQKVVVDLSEEEEEKVELKESENLAGSDQ  
 PRTAAVGEICEEGLHVLEGLAASGLRSIRFALEVPLGRSVVANDASTRAVDLIRRVQLNDVAHLVQPSQ  
 ADARMLMQHQVRVSRFDVIDLDPYGPATFLDAAVQAVSEGGLLCTVCTDMAVLAGNSGETCYSKYGAM  
 ALKSRACHEMALRIVLHSLDLRANCYQRFVVPLLSISADFYVVRVFRVFTGQAKVKASASKQALVFCVQ  
 CGAFHLQRLGKASGVPSGRAKFSAACGPPVTPECEHCQRHQLGGPMWAEPIHDLDFVGRVLEAVSANPG  
 RFHTSERIRGVLSVITEELPDVPLYTLDQLSSITHCNTPSLLQLRSALLHADFRVLSLHACKNAVKTDA  
 PASALWDIMRCWEKCPVKRERLSETPAFRILSVEPRLQANFTIREDANPSSRQGLKRFQANPEANWG  
 PRPRARPGKADEAMEERRRLLQNKRRKEPPEDVAQRAARLKTFFPCKRFKEGTCQRGDCCYSHSPPTPR  
 VSADAAPDCPETSNTQTPPGGAAAGPGID

| Predicted bipartite NLS               | Score |
|---------------------------------------|-------|
| RRRLLQNKRRKEPPEDVAQRAARLKTFFPCKRFKE   | 5.5   |
| RRRLLQNKRRKEPPEDVAQRAARLKTFFPCKRFKEGT | 5.3   |
| RLKTFFPCKRFKEGTCQRGDCCYSHSPPTPRVSAD   | 5.2   |

**TRMT1L**

MENMAEEELLPLEKEEVEVAQVQVPTPARDSAGVPAPAPDSALDSAPTASAPAPAPALAQAPALSPSL  
 ASAPPEAKSKRHISIQRQLADLENLAFVTDGNFDSASSLNSDNLDAENRQACPLCPKEKFRACNSHKLK  
 RHLQNLHWKVSVEFEGYRMCICHLPCRVPVKPNIIGEQITSKMGAYHICIICSATITRRDMLGHVRRHM  
 NKGETKSSYIAASTAKPPKEILKEADTDVQVCPNYSIPQKTDSYFNPMMKLNRLIFICTLAALAEERKP  
 LECLDAFGATGIMGLQWAKHLGNVAVKVTINDLNENSVTLIQENCHLNKLVVVDSEKEKSDDILEEGE  
 KNLGNIKVTKMDANVLMHLRSFDFIHLDPFGTSVNYLDSAFRNIRNLGIVSVTSDISSLYAKAQHVAR  
 RHYGCNIVRTEYYKELAAIRIVVAVARAAARCNKGIIEVLFVALEHFVLVVVRVLRGPTSADETAKKIQ  
 YLIHCQWCEERIFQKQGNMVEENPYRQLPCNCHGSMGKTAIELGLWSSSLFNTGFLKRMFLFESLHHG  
 LDDIQTLIKTLIFESCTPQSQFSIHASSNVNKQEENGVFIKTTDDTTTDNYIAQGKRKSNEMITNLGK  
 KQKTDVSTEHPPFYNIHRHSIKGMNMPKLLKFLCYLSQAGFRVSRTHFDPMGVRTDAPLMQFKSILLK  
 YSTPTYTGQGSSESHVQSASEDTVTRVERVMS  
 VNDKAEASGCRRW

| Predicted bipartite NLS | Score |
|-------------------------|-------|
| IAQGKRKSNEMITNLGKQKQTD  | 8.8   |

**B TRMT1**

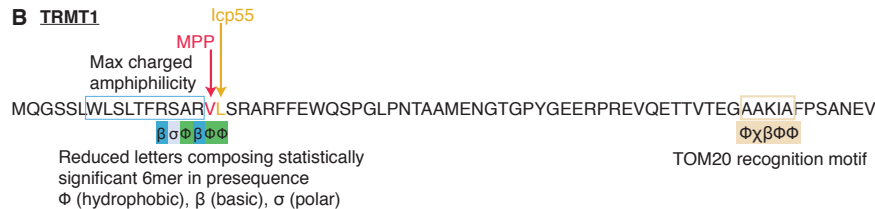

**C TRMT1**

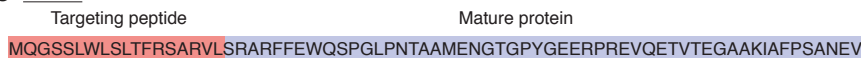

**D**

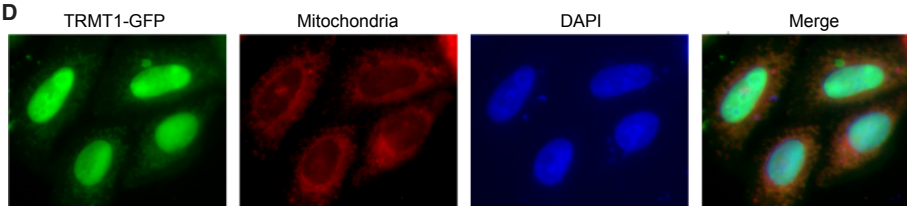

**Supplemental Figure 2.** PHA assay on mitochondrial tRNAs. An increase in signal for the D-AC PHA probe was detected for mitochondrial tRNA-Ile-GAU isolated from TRMT1-KO cells. No change in PHA signal was detected for any of the other mitochondrial tRNAs containing G at position 26.

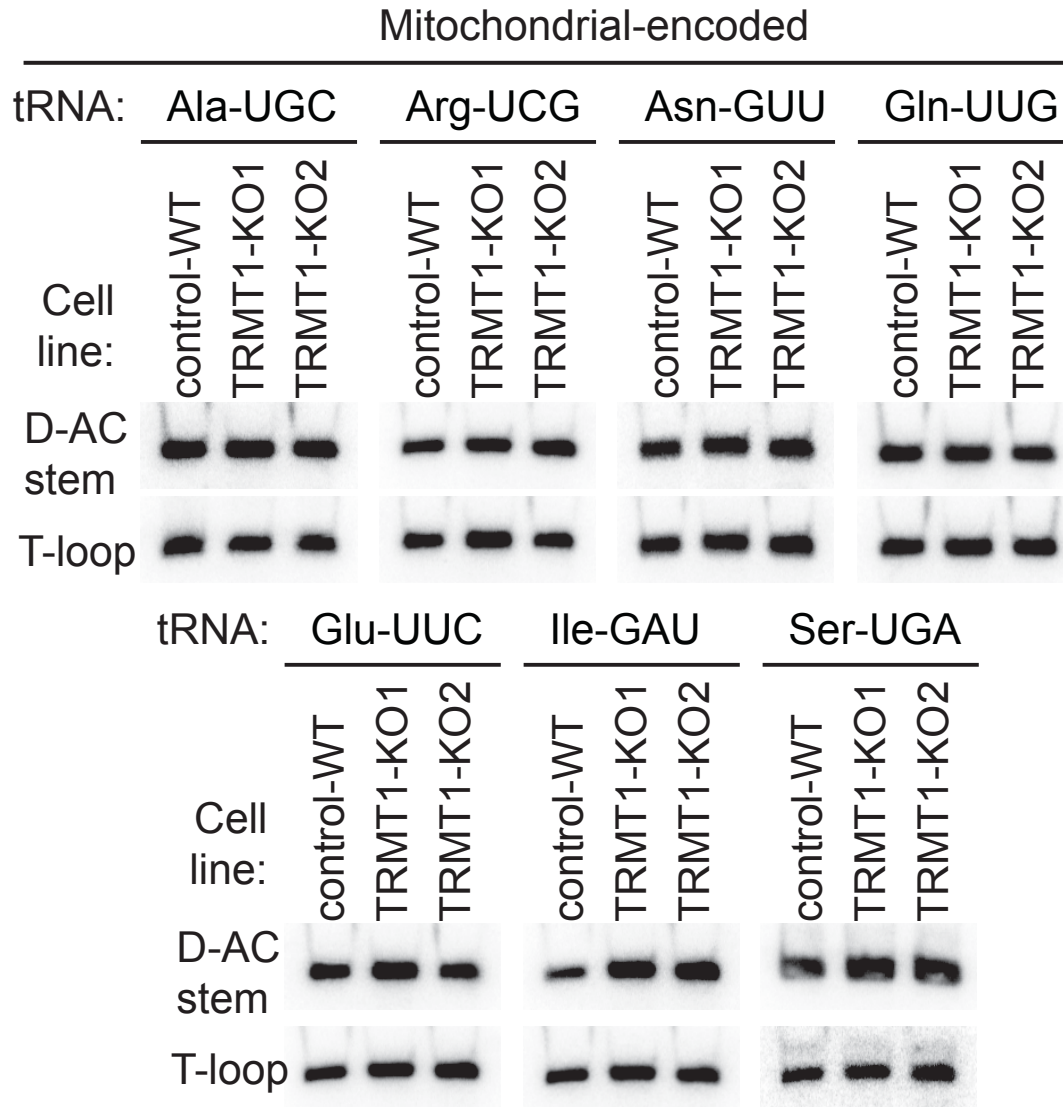

**Supplemental Figure 3.** *De novo* protein synthesis assays via puromycin labeling. (A) Nascent polypeptide chains labeled with puromycin from control-WT or TRMT1-KO cell lines were fractionated and detected by immunoblotting. Total protein serves as loading control. (B) Quantification of relative *de novo* protein synthesis as measured by the accumulation of puromycin-labeled polypeptides. The mean and standard deviation represents the puromycin signal of each cell line relative to control-WT after normalization to total protein from three independent labeling experiments. (C) Cells were incubated with the indicated concentration of puromycin in the absence or presence of cycloheximide (50  $\mu\text{g}/\text{mL}$ ) to block protein synthesis followed by harvesting and immunoblotting. (\*) denotes a loading control protein that was probed simultaneously with the puromycin-labeled polypeptides.

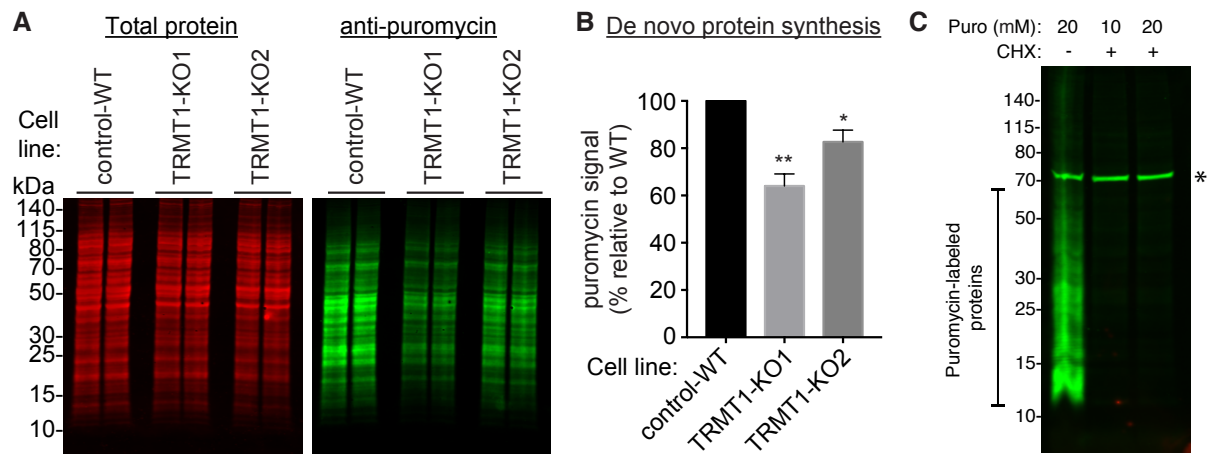

**Supplemental Figure 4.** TRMT1-KO cell lines exhibit defects in ROS homeostasis without major changes in mitochondrial membrane potential or mitochondrial ROS. (A) Flow cytometry scatter plots measuring mitochondrial potential using TMRE. The percentage of depolarized/dead, dead, depolarized/live and polarized/live cells (green quadrant) are denoted. As a control, cells were treated with FCCP to dissipate the mitochondrial membrane potential (lower panels). (B) Quantification of three independent mitochondrial membrane potential assays. Plotted are the live cells with polarized mitochondria (green quadrant of scatter plot). (C) Flow cytometry histogram plots of the indicated cell lines stained with the mitochondrial ROS detection stain, MitoSox Red with relative quantification shown in (D). (E) Flow cytometry histogram plots of the indicated cell lines stained with the cytoplasmic ROS detection stain, CellRox Orange with relative quantification shown in (F). Error bars for ROS measurements represent the standard deviation of three independent experiments. (\*)  $p < 0.05$ ; (\*\*)  $p < 0.01$ .

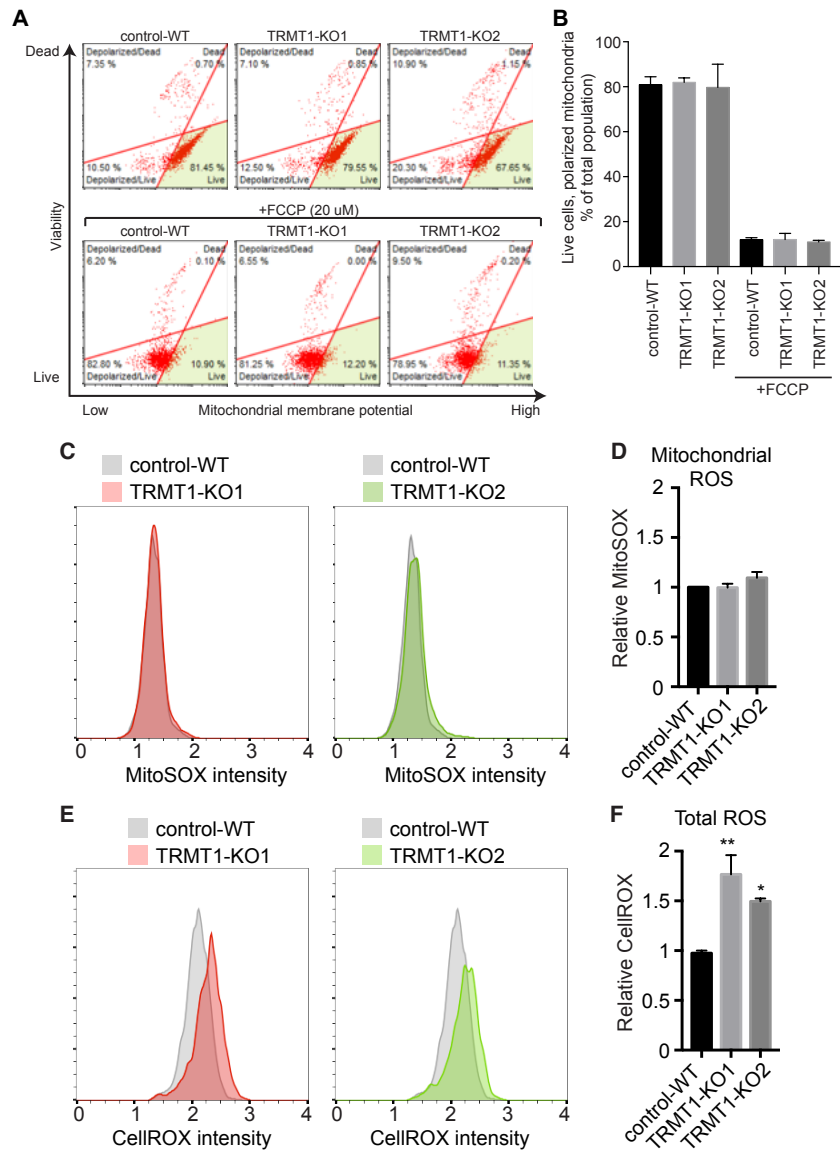

**Supplemental Figure 5.** Analysis of TRMT1 function in oxidative stress survival. (A, B) Flow cytometry scatter plots of propidium iodide-positive (dead cells) versus nucleated (total) cells after mock treatment (A) or exposure to *t*-bu-OOH (B). (C) The indicated cell lines were transfected with either empty vector or TRMT1 expression constructs followed by splitting into 6-well plates at 24-hours post-transfection. At 48-hours post-transfection, cells from one well of each transfection was harvested for extract preparation and immunoblot analysis while other wells were treated with *t*-buOOH (see Fig. 6). Error bars for (A) represent the standard deviation of three independent experiments. (\*\*)  $p < 0.01$ ; (\*\*\*)  $p < 0.001$ ; (\*\*\*\*)  $p < 0.0001$ .

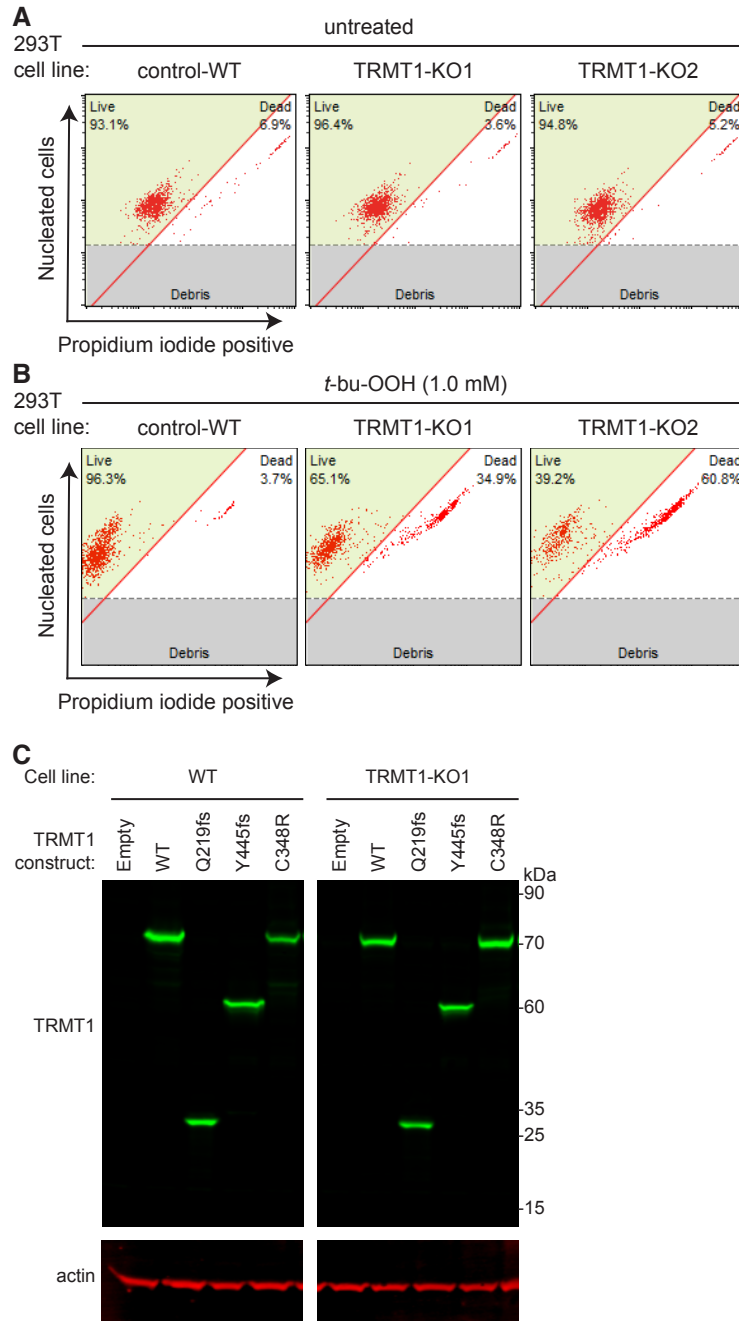

**Table S1.** Oligonucleotides used in this study.

| <b>TRMT1 cloning</b>                       | <b>Sequence (5'-3')</b>                                |
|--------------------------------------------|--------------------------------------------------------|
| TRMT1_HindIII_F                            | GAACT AAGCTT ATGCAAGGATCGTCTCTGTGGCTAA                 |
| TRMT1_NotI_R                               | CATGA GCGGCCGC TCAGTCTATGCCTGGCCCAGC                   |
| TRMT1_KpnI_F                               | GAACT GGTACC ATGCAAGGATCGTCTCTGTGGCTAA                 |
| TRMT1_NotI_R_nostop                        | CATGA GCGGCCGC GTCTATGCCTGGCCCAGCGG                    |
| TRMT1_ΔMTS_HindIII_F                       | GAACT AAGCTT ATGGAGAACGGCACCAGGGCC                     |
| TRMT1_ΔMTS_KpnI_F                          | GAACTGGTACCATGGAGAACGGCACCAGGGCC                       |
| silent_gs1_frag1_fwd                       | ccaagctggctagcgttttaaacttaagcttATGCAAGGATCGTCTCTGT     |
| silent_gs1_frag1_rev                       | aattcttggactggattgTAAAAGACCTCGTTGGCAC                  |
| silent_gs1_frag2_fwd                       | acgaggtcctttacaatccagtcacaagAATTC AATCGGGACCTGACATG    |
| silent_gs1_frag2_rev                       | ttaaacggggccctctagactcgagcggccgcTCAGTCTATGCCTGGCCC     |
| C348R_frag1_fwd                            | ccaagctggctagcgttttaaacttaagcttATGCAAGGATCGTCTCTGTG    |
| C348R_frag1_rev                            | ccgcagcccacacgCTGGAACACCAGCGCCTG                       |
| C348R_frag2_fwd                            | gctggtgttccagcGTGTGGGCTGCGGGGCCT                       |
| C348R_frag2_rev                            | ttaaacggggccctctagactcgagcggccgcTCAGTCTATGCCTGGCCCAGCG |
| TRMT1_mut_F1(Q219)                         | gccagcgggagcccaagcttATGCAAGGATCGTCTCTGT                |
| TRMT1_mut_R1(Q219)                         | cagatcgaTGGTACATCAGCATCCGG                             |
| TRMT1_mut_F2(Q219)                         | gatgtaccaTCGATCTGGACCCCTATG                            |
| TRMT1_mut_R2(Q219)                         | cctctagactcgagcggccgcTCAGTCTATGCCTGGCCC                |
| Y445L_fs_frag1_fwd                         | caccctcagggccagcgggagcccaagcttATGCAAGGATCGTCTCTGTGGC   |
| Y445L_fs_frag1_rev                         | tccaggggtgtagtAGAGGCACGTCCGGGAGC                       |
| Y445L_fs_frag2_fwd                         | cggacgtgcctctACTACACCCTGGACCAGC                        |
| Y445L_fs_frag2_rev                         | ttaaacggggccctctagactcgagcggccgcTCAGTCTATGCCTGGCCC     |
| <b>CRISPR mutagenesis</b>                  |                                                        |
| TRMT1_gs_F1                                | CACCGGGTCTTTTATAACCCGGTGC                              |
| TRMT1_gs_R1                                | AAACGCACCGGGTTATAAAAGACCC                              |
| TRMT1_gs_F3                                | CACCGCGTGGACGTTCTTCTCCGTA                              |
| TRMT1_gs_R3                                | AAACTACGGAGAAGAACGTCCACGC                              |
| TRMT1-gPCR-HIII-F2                         | GAACT AAGCTT agtcatccccaaaacgaggg                      |
| TRMT1-gPCR-BHI-R6                          | CGC GGATCC cccaggcaggagataaactt                        |
| <b>T-loop (nuclear encoded tRNAs)</b>      |                                                        |
| Ala-AGC-G57                                | TGGAGAATGYGGGCGTCGATCCC                                |
| Arg-ACG-G59                                | GAGCCAGCCAGGAGTCGAACCT                                 |
| Asn-GTT-G56                                | CGCTaACCGATTGCGCCACAGAGAC                              |
| Gly-CCC                                    | TGATACCACTACACCAGCGGCGC                                |
| Leu-CAA                                    | TGTCAGAAGTGGGATTTCGAACCCACGC                           |
| Met-CAT                                    | AACTCACGACCTTCAGATTATG                                 |
| Phe-GAA                                    | GGGATCGAACCAGGGACCTTTAGATC                             |
| Ser-AGA                                    | GCGCGGGGAGACCCCAATGGATT                                |
| Thr-CGT                                    | AGGCACGGACGGGGTTTCGAACC                                |
| Trp-CCA                                    | CCCCGACGTGATTTGAACACGCAa                               |
| Val-CAC                                    | GGaCCTTTCGCGTGTGAGGCGA                                 |
| Ile-TAT 5'-exon                            | TAT AAG TAC CGC GCG CTA AC                             |
| <b>D-AC probes (nuclear encoded tRNAs)</b> |                                                        |
| Ala-AGC-G57                                | TGCTAAGCACGCGCTCTACCACT                                |
| Arg-ACG-G59                                | TCCGTAGTCAGACGCGTTaTCCAT                               |
| Asn-GTT-G56                                | ACAGCCGAACGCGCTaACC                                    |
| Gly-CCC                                    | AATGGGAATCTTGCATGATACCACT                              |
| Leu-CAA                                    | CTTGAGTCTGGCGCCTTAGAC                                  |
| Met-CAT                                    | GAGACTGACGCGCTGCCTACT                                  |
| Phe-GAA                                    | TCTTCAGTCTAACGCTCTCCCAAC                               |
| Ser-AGA                                    | ATTTCTAGTCCATCGCCTTaACCAC                              |

|                                                   |                                     |
|---------------------------------------------------|-------------------------------------|
| Thr-CGT                                           | AGACCGACGCCTTACCACTT                |
| Trp-CCA                                           | TCTGGAGTCAGACGCGCTACCG              |
| Val-CAC                                           | TGTGAGGCGAACGTGATaACCACT            |
| IleTAT 3'exon                                     | CGAACTCACAACTCGGCAT                 |
| <b>T-loop probe (mitochondrial-encoded tRNAs)</b> |                                     |
| Ala-TGC                                           | ACTCTGCATCAACTGAACGCAAATCA          |
| Arg-TCG                                           | TAAATATGATTATCATAATTTAATGAGTCGAAATC |
| Asn-GTT                                           | CCCTAATCAACTGGCTTCAATCTA            |
| Gln                                               | GCCACCTATCACACCCCATCCTA             |
| Glu                                               | TCGCACGGACTACAACCACGA               |
| Ile-GAT                                           | GGGTTTAAGCTCCTATTATTTACTCTATCAAA    |
| Ser-TGA                                           | CAAAAAAGGAAGGAATCGAACCCC            |
| <b>D-AC probe (mitochondrial encoded)</b>         |                                     |
| Ala-TGC                                           | GAACGCAAATCAGCCACTTTAATTAA          |
| Arg-TCG                                           | GAGTCGAAATCATTTCGTTTTGTTTTAAA       |
| Asn-GTT                                           | GTTAACAGCTAAGCACCCCTAATCA           |
| Gln                                               | ATCCAAAATTCTCCGTGCCACCTAT           |
| Glu                                               | ATATGAAAAACCATCGTTGTATTTCAACT       |
| Ile-GAT                                           | TCTATCAAAGTAACTCTTTTATCAGAC         |
| Ser-TGA                                           | AAGCCAACCCCATGGCCTCC                |
| <b>Primer extension</b>                           |                                     |
| IleTAT 55-34                                      | AACTCACAaCCTCGGCATTATA              |
| AlaAGC 54-36                                      | TCCCGCTACCTCTCGCATG                 |
| Met-CAU 55-34                                     | AACTCACGACCTTCAGATTATG              |
| Phe-GAA 63-37                                     | CGGGATCGAACCAGGGACCTTTAGATC         |
| Ile-GAU mito 54-30                                | TTAAGCTCCTATTATTTACTCTATC           |
| <b>Additional Northern blot probes</b>            |                                     |
| tRNA-Glu-UUC                                      | CCAGGAATCCTAACCCTAGACCATRTGGGA      |
| U6 snRNA                                          | CGTTCCAATTTTAGTATATGTGCTGCCGAAGCGA  |

**Table S2.** Mass spectrometer parameters of all analyzed nucleosides

| Compound Name              | Precursor Ion | Product Ion | Ret Time (min) | Delta Ret Time | Fragmentor Voltage | Collision Energy (eV) | Cell Accelerator Voltage | Polarity |
|----------------------------|---------------|-------------|----------------|----------------|--------------------|-----------------------|--------------------------|----------|
| 15N dA (internal standard) | 257           | 141         | 7,3            | 2              | 380                | 10                    | 2                        | Positive |
| ac4C                       | 286           | 154         | 6,8            | 2              | 380                | 10                    | 2                        | Positive |
| Am                         | 282           | 136         | 8,8            | 2              | 380                | 10                    | 2                        | Positive |
| Cm                         | 258           | 112         | 4,4            | 2              | 380                | 10                    | 2                        | Positive |
| cm5U                       | 303           | 171         | 1,9            | 1              | 380                | 10                    | 2                        | Positive |
| cm5Um                      | 317           | 171         | 4,4            | 2              | 380                | 10                    | 2                        | Positive |
| D                          | 247           | 115         | 1,7            | 1              | 380                | 10                    | 2                        | Positive |
| Gm                         | 298           | 152         | 6,5            | 2              | 380                | 10                    | 2                        | Positive |
| I                          | 269           | 137         | 4,7            | 2              | 380                | 10                    | 2                        | Positive |
| i6A                        | 336           | 204         | 14,2           | 2              | 380                | 10                    | 2                        | Positive |
| m1A                        | 282           | 150         | 2,8            | 2              | 380                | 10                    | 2                        | Positive |
| m1G                        | 298           | 166         | 6,4            | 0,5            | 380                | 10                    | 2                        | Positive |
| m2,2G                      | 312           | 180         | 8,1            | 2              | 380                | 10                    | 2                        | Positive |
| m2G                        | 298           | 166         | 6,8            | 0,5            | 380                | 10                    | 2                        | Positive |
| m3C                        | 258           | 126         | 3,3            | 1              | 380                | 10                    | 2                        | Positive |
| m3U                        | 259           | 127         | 5,9            | 1              | 380                | 10                    | 2                        | Positive |
| m5C                        | 258           | 126         | 4              | 1              | 380                | 10                    | 2                        | Positive |
| m5s2U                      | 275           | 143         | 7,5            | 2              | 380                | 10                    | 2                        | Positive |
| m5U                        | 259           | 127         | 5,1            | 1              | 380                | 10                    | 2                        | Positive |
| m62A                       | 296           | 164         | 12,5           | 2              | 380                | 10                    | 2                        | Positive |
| m6t6A                      | 427           | 295         | 10             | 2              | 380                | 10                    | 2                        | Positive |
| m7G                        | 298           | 166         | 4              | 2              | 380                | 10                    | 2                        | Positive |
| mcm5U                      | 317           | 185         | 6,5            | 2              | 380                | 10                    | 2                        | Positive |
| mcm5Um                     | 331           | 153         | 8,9            | 2              | 380                | 10                    | 2                        | Positive |
| ms2i6A                     | 382           | 250         | 16             | 2              | 380                | 10                    | 2                        | Positive |
| Psi                        | 245           | 191         | 1,7            | 2              | 380                | 10                    | 2                        | Positive |
| Q                          | 410           | 295         | 5,7            | 2              | 380                | 10                    | 2                        | Positive |
| t6A                        | 413           | 281         | 8,4            | 2              | 380                | 10                    | 2                        | Positive |
| Um                         | 259           | 113         | 5,7            | 2              | 380                | 10                    | 2                        | Positive |
